# Supplementary material
Source: PubMed Central journal article supplement (PMC5853238)

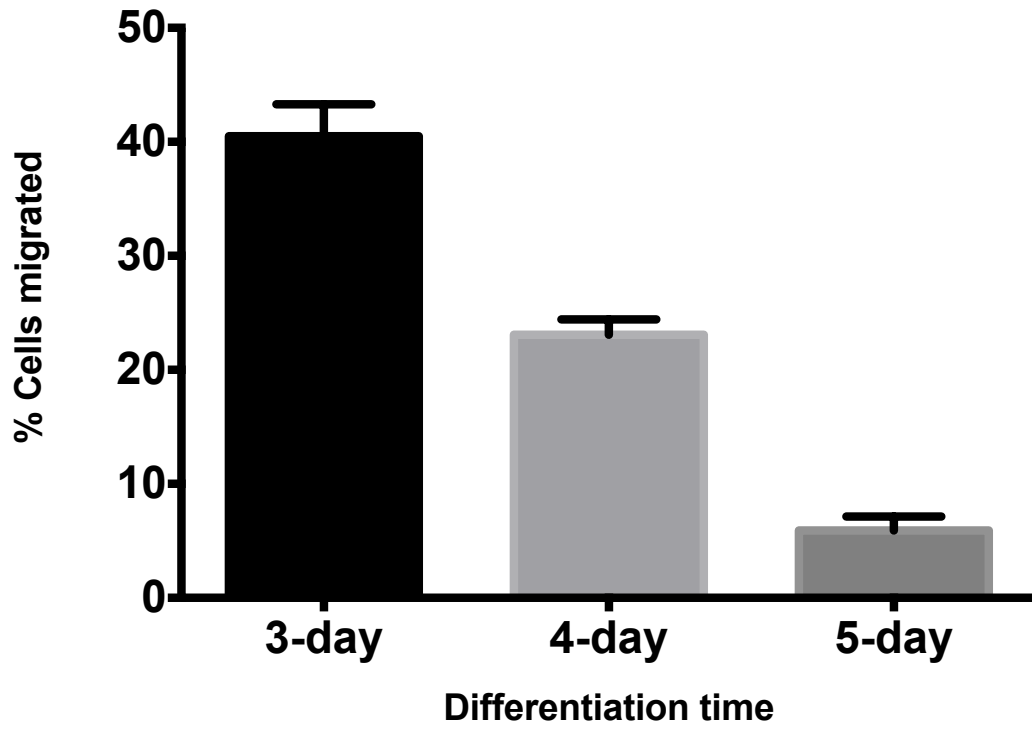

Supplement: jiw513supp_fig1.pdf [file jiw513supp_fig1.pdf]
